# Supplementary material
Source: Copernicus journal article supplement (doi:10.5194/essd-2026-242)
Supplement: Supplementary file 1 [file essd-2026-242-supplement.pdf]

Supplementary material for the manuscript entitled

## TReAD: 40-year Taiwan Reanalysis Downscaling Dataset at 2 km

Chao-Tzuen Cheng <sup>a</sup>, Chihchung Chou <sup>a</sup>, Ping-Yi Lin <sup>a</sup>, Huang-Hsiung Hsu <sup>b</sup>, Yung-Ming Chen <sup>a</sup>

<sup>a</sup>National Science and Technology Center for Disaster Reduction, New Taipei City, Taiwan

<sup>b</sup>Research Center for Environmental Changes, Academia Sinica, Taipei, Taiwan

Table S1. Names, elevations, longitudes and latitudes of the used CWA observation stations

| Number | Name        | Elevation above sea level (m) | Longitude | Latitude |
|--------|-------------|-------------------------------|-----------|----------|
| 1      | Tamsui      | 19                            | 121.4489  | 25.1649  |
| 2      | Anbu        | 825.8                         | 121.5297  | 25.1826  |
| 3      | Taipei      | 6.3                           | 121.5149  | 25.0377  |
| 4      | Zhuzihu     | 607.1                         | 121.5445  | 25.1621  |
| 5      | Keelung     | 26.7                          | 121.7405  | 25.1333  |
| 6      | Hualien     | 16                            | 121.6133  | 23.9751  |
| 7      | Yilan       | 7.2                           | 121.7565  | 24.764   |
| 8      | Dongjidao   | 43                            | 119.6675  | 23.257   |
| 9      | Penghu      | 10.7                          | 119.5631  | 23.5655  |
| 10     | Tainan      | 40.8                          | 120.2048  | 22.9932  |
| 11     | Kaohsiung   | 2.3                           | 120.3157  | 22.566   |
| 12     | Taichung    | 84                            | 120.6841  | 24.1457  |
| 13     | Alishan     | 2413.4                        | 120.8132  | 23.5082  |
| 14     | Dawu        | 8.1                           | 120.9038  | 22.3557  |
| 15     | Yushan      | 3844.8                        | 120.9595  | 23.4876  |
| 16     | Hengchun    | 22.1                          | 120.7463  | 22.0039  |
| 17     | Chenggong   | 33.5                          | 121.3734  | 23.0975  |
| 18     | Lanyu       | 324                           | 121.5583  | 22.037   |
| 19     | Sunmoonlake | 1017.5                        | 120.9081  | 23.8813  |
| 20     | Taitung     | 9                             | 121.1546  | 22.7522  |

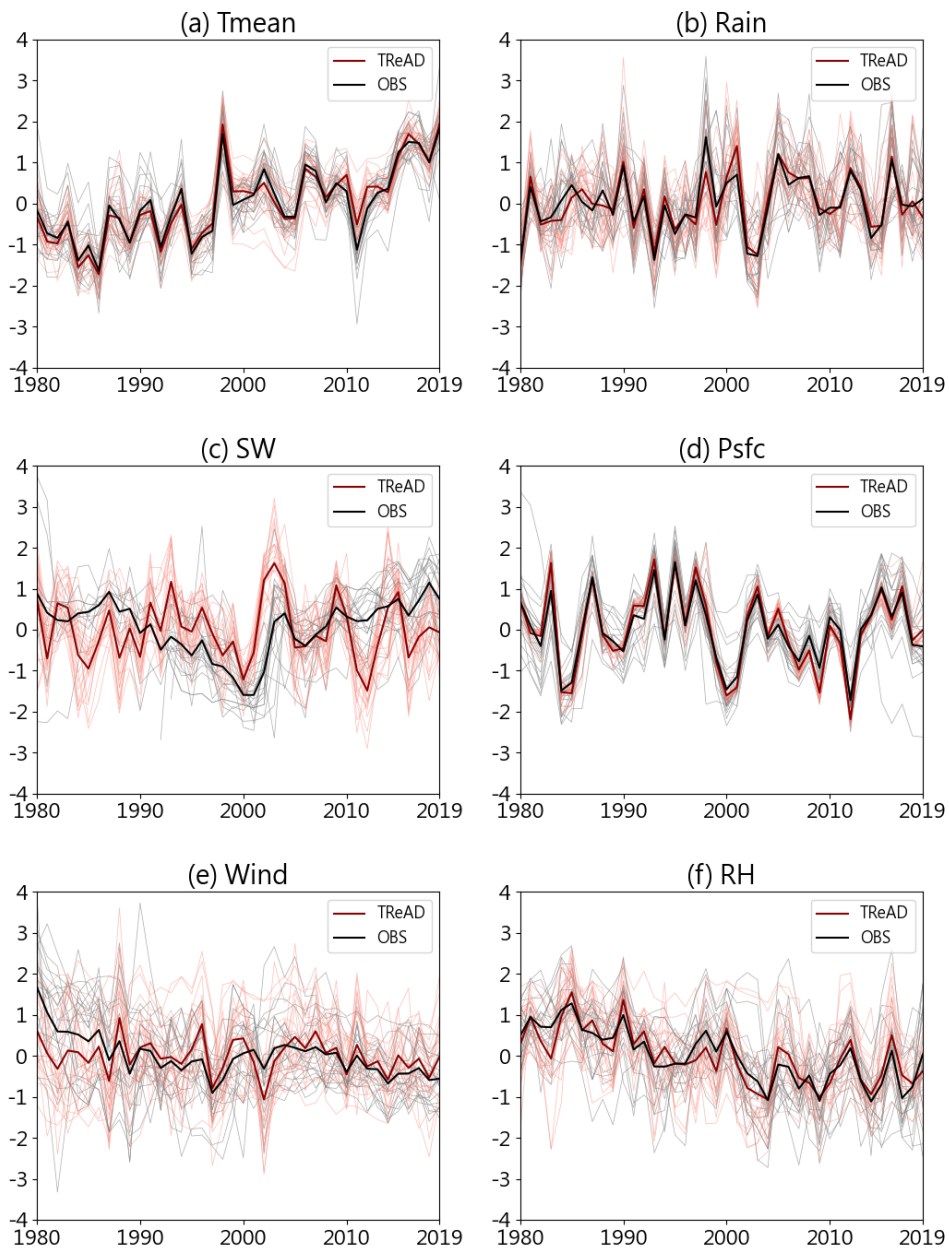

Figure S1. Annual time series of the six ECVs for TReAD and CWA data sets for the period from 1980 to 2019.

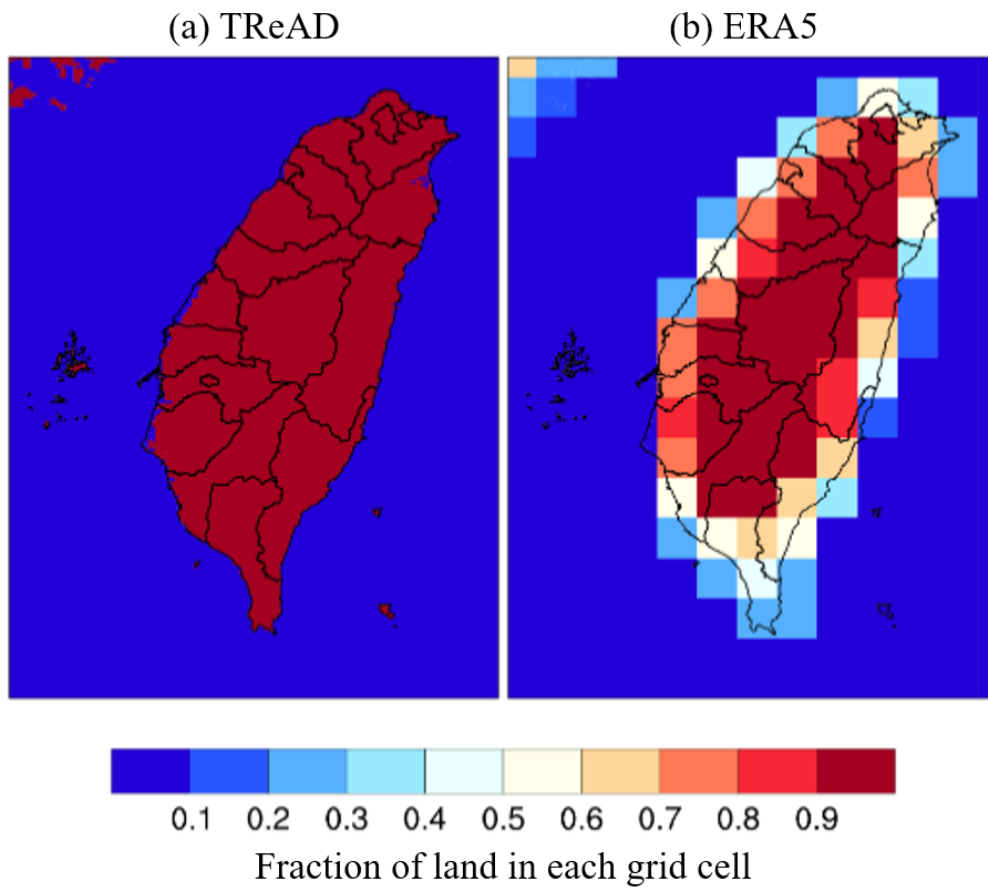

Figure S2. Spatial distribution of the fraction of land in each grid cell of (a) TReAD and (b) ERA5

Table S2. USGS 24 categories of WRF

| Land use category | Land use description                         |
|-------------------|----------------------------------------------|
| 1                 | Urban and Built-Up Land                      |
| 2                 | Dryland Cropland and Pasture                 |
| 3                 | Irrigated Cropland and Pasture               |
| 4                 | Mixed Dryland/Irrigated Cropland and Pasture |
| 5                 | Cropland/Grassland Mosaic                    |
| 6                 | Cropland/Woodland Mosaic                     |
| 7                 | Grassland                                    |
| 8                 | Shrubland                                    |
| 9                 | Mixed Shrubland/Grassland                    |
| 10                | Savanna                                      |
| 11                | Deciduous Broadleaf Forest                   |
| 12                | Deciduous Needleleaf Forest                  |
| 13                | Evergreen Broadleaf                          |
| 14                | Evergreen Needleleaf                         |
| 15                | Mixed Forest                                 |
| 16                | Water Bodies                                 |
| 17                | Herbaceous Wetland                           |
| 18                | Wooden Wetland                               |
| 19                | Barren or Sparsely Vegetated                 |
| 20                | Herbaceous Tundra                            |
| 21                | Wooded Tundra                                |
| 22                | Mixed Tundra                                 |
| 23                | Bare Ground Tundra                           |
| 24                | Snow or Ice                                  |
